# Supplementary material
Source: PubMed Central journal article supplement (PMC3503115)
Supplement: JVI.02081-12_zjv999097008so1.pdf [file JVI.02081-12_zjv999097008so1.pdf]

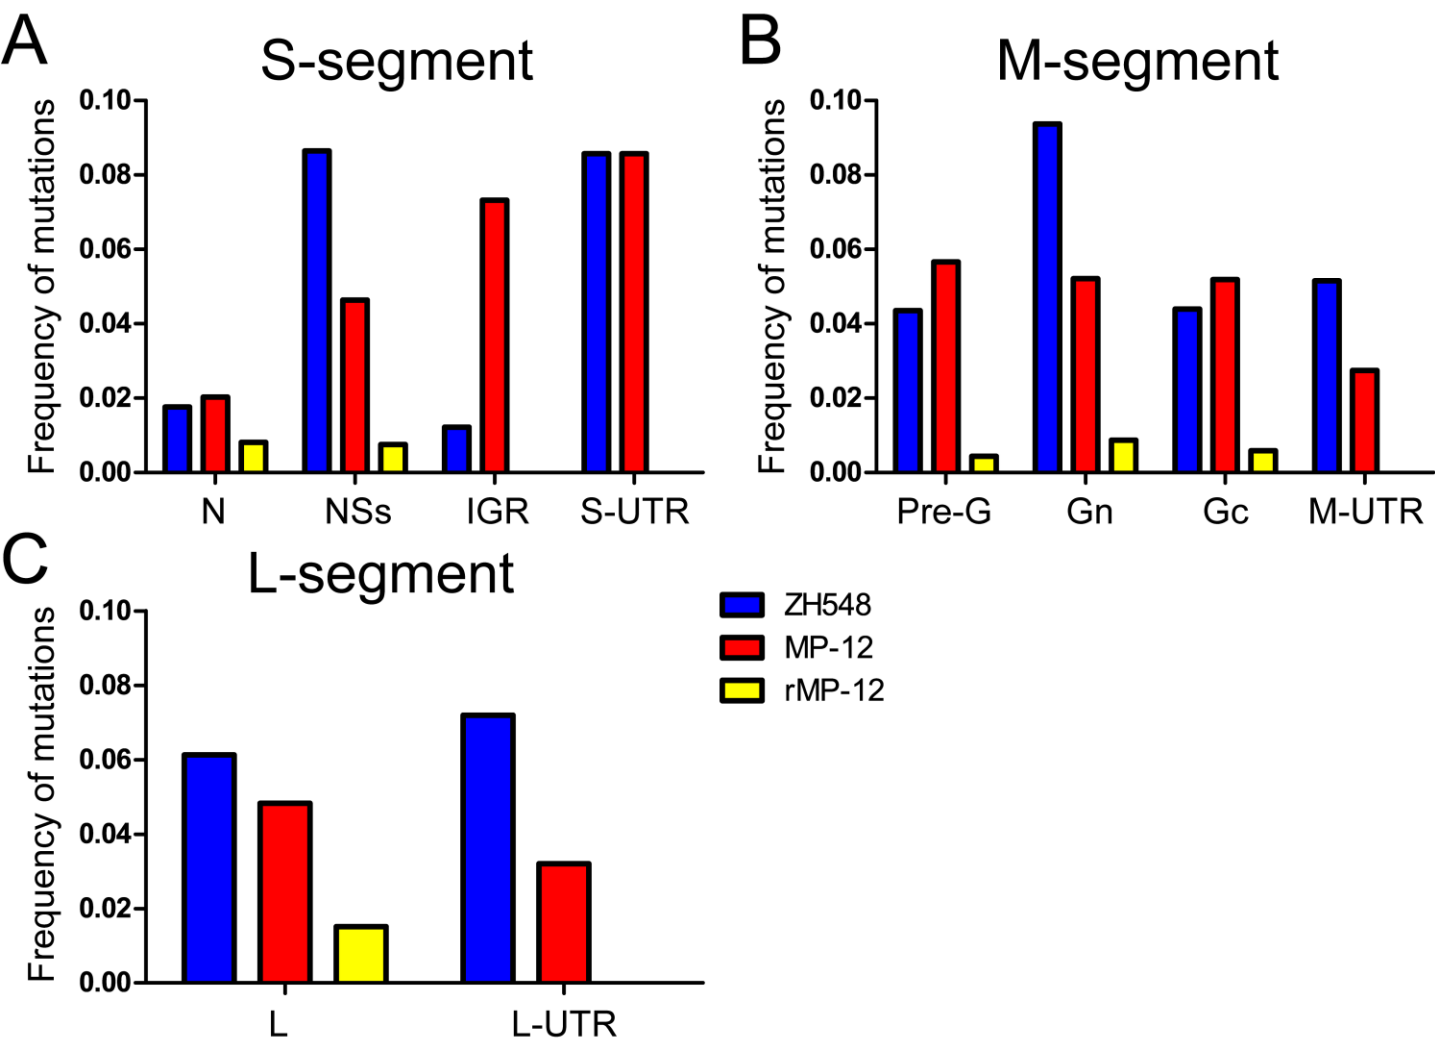

**Fig. S1.** Mutation frequency. The frequency of mutations in (A) S-segment with N, NSs, intergenic region (IGR), S-untranslated region (UTR), (B) M-segment with pre-glycoregion (ORF at the upstream of Gn cleavage site), Gn, Gc and M-UTR, and (C) L-segment with L ORF and L-UTR are shown. The frequency of mutations is represented by the number of mutations divided by the length of corresponding genome element.
